# Inhibition of Poly(Adenosine Diphosphate–Ribose) Polymerase Attenuates Ventilator-induced Lung Injury

Rosanna Vaschetto, M.D.,\* Jan W. Kuiper, M.D.,† Shyh Ren Chiang, M.D.,‡ Jack J. Haitsma, M.D., Ph.D.,§ Jonathan W. Juco, M.D.,|| Stefan Uhlig, Ph.D.,# Frans B. Plötz, M.D., Ph.D.,\*\* Francesco Della Corte, M.D.,†† Haibo Zhang, M.D., Ph.D.,‡‡ Arthur S. Slutsky, M.D.§§

**Background:** Mechanical ventilation can induce organ injury associated with overwhelming inflammatory responses. Excessive activation of poly(adenosine diphosphate–ribose) polymerase enzyme after massive DNA damage may aggravate inflammatory responses. Therefore, the authors hypothesized that the pharmacologic inhibition of poly(adenosine diphosphate–ribose) polymerase by PJ-34 would attenuate ventilator-induced lung injury.

**Methods:** Anesthetized rats were subjected to intratracheal instillation of lipopolysaccharide at a dose of 6 mg/kg. The animals were then randomly assigned to receive mechanical ventilation at either low tidal volume (6 ml/kg) with 5 cm H<sub>2</sub>O positive end-expiratory pressure or high tidal volume (15 ml/kg) with zero positive end-expiratory pressure, in the presence and absence of intravenous administration of PJ-34.

**Results:** The high-tidal-volume ventilation resulted in an increase in poly(adenosine diphosphate–ribose) polymerase activity in the lung. The treatment with PJ-34 maintained a greater oxygenation and a lower airway plateau pressure than the vehicle control group. This was associated with a decreased level of interleukin 6, active plasminogen activator inhibitor 1 in the lung, attenuated leukocyte lung transmigration, and reduced pulmonary edema and apoptosis. The administration of PJ-34 also decreased the systemic levels of tumor necrosis factor  $\alpha$  and interleukin 6, and attenuated the degree of apoptosis in the kidney.

**Conclusion:** The pharmacologic inhibition of poly(adenosine diphosphate–ribose) polymerase reduces ventilator-induced lung injury and protects kidney function.

INJURIOUS mechanical ventilation can lead to the development of an overwhelming inflammatory response and multiple organ dysfunction syndrome.<sup>1-5</sup> Acute renal failure is the most prevalent form of distal organ dysfunction associated with endothelial and epithelial cell death in patients with ventilator-induced lung injury (VILI).<sup>2,6-8</sup>

The clinical importance of VILI has been highlighted in a multicenter clinical trial demonstrating that mechanical ventilation with low tidal volume ( $V_T$ ) significantly decreased cytokine responses, multiple organ dysfunction syndrome, and mortality rate compared with high  $V_T$  in patients with acute respiratory distress syndrome (ARDS).<sup>9,10</sup> However, in situations where a fully lung protective strategy is not possible, it would be necessary to use pharmacologic therapies to mitigate the consequences of VILI and multiple organ dysfunction syndrome.

Poly(adenosine diphosphate–ribose) polymerase (PARP) 1 is the most abundant member of PARP family,<sup>11</sup> whose primary role is to sense DNA damage, repair DNA, and maintain genomic stability.<sup>12</sup> However, when severe DNA injury occurs in response to oxidative stress, excessive up-regulation of PARP may be detrimental by depleting cellular adenosine triphosphate stores, resulting in cell dysfunction and death.<sup>13-16</sup> This cellular suicide mechanism has been implicated in the pathophysiology of acute lung injury,<sup>17</sup> acute renal failure secondary to ischemia–reperfusion,<sup>18</sup> and sepsis.<sup>19</sup> It has been reported that PARP-1 can directly interact with both subunits of p65 and p50 and synergistically coactivates nuclear factor  $\kappa$ B (NF- $\kappa$ B).<sup>20-23</sup> The potent PARP inhibitor PJ-34 can decrease PARP-1 activity and thus NF- $\kappa$ B activation in animal models of endotoxic and hemorrhagic shock.<sup>17-19,24-27</sup>

In the current study, we tested the hypothesis that inhibition of PARP by PJ-34 would attenuate VILI and preserve kidney function by its antiinflammatory property. We demonstrated that high- $V_T$  ventilation induced an increase in PARP activity in the lung associated with an enhanced inflammatory response. The treatment with PJ-34 attenuated the mechanical ventilation–induced cytokine responses, decreased the level of active plasminogen activator inhibitor 1 (PAI-1) in the lung, and reduced leukocyte infiltration and pulmonary edema. Furthermore, inhibition of PARP resulted in fewer kid-

\* Fellow, The Keenan Research Centre, Li Ka Shing Knowledge Institute, St. Michael's Hospital; Department of Anaesthesia, Department of Physiology, Interdepartmental Division of Critical Care Medicine, University of Toronto, Toronto, Ontario, Canada; Departments of Anesthesiology and Critical Care Medicine, University of Eastern Piedmont, Novara, Italy. † Fellow, The Keenan Research Centre, Li Ka Shing Knowledge Institute, St. Michael's Hospital; Department of Anaesthesia, Department of Physiology, Interdepartmental Division of Critical Care Medicine, University of Toronto, Toronto, Ontario, Canada; Department of Pediatric Intensive Care, Vrije Universiteit Medical Center (VUMC), Amsterdam, The Netherlands. ‡ Fellow, The Keenan Research Centre, Li Ka Shing Knowledge Institute, St. Michael's Hospital; Department of Physiology, Interdepartmental Division of Critical Care Medicine, University of Toronto, Toronto, Ontario, Canada; Department of Chest Medicine, Chi Mei Medical Center, Tainan, Taiwan. § Fellow, ‡‡ Professor, The Keenan Research Centre, Li Ka Shing Knowledge Institute, St. Michael's Hospital; Department of Anaesthesia, Department of Physiology, Interdepartmental Division of Critical Care Medicine, University of Toronto, Toronto, Ontario, Canada. || Staff Pathologist, The Keenan Research Centre, Li Ka Shing Knowledge Institute, St. Michael's Hospital. # Professor, Institute of Pharmacology and Toxicology, Rheinisch-Westfälische Technische Hochschule Aachen, Germany. \*\* Assistant Professor, Department of Pediatric Intensive Care, VUMC, Amsterdam, The Netherlands. †† Professor, Departments of Anesthesiology and Critical Care Medicine, University of Eastern Piedmont, Novara, Italy. §§ Professor, The Keenan Research Centre, Li Ka Shing Knowledge Institute, St. Michael's Hospital; Interdepartmental Division of Critical Care Medicine, University of Toronto, Toronto, Ontario, Canada.

Received from the Keenan Research Centre, Li Ka Shing Knowledge Institute, St. Michael's Hospital, Toronto, Ontario, Canada. Submitted for publication May 14, 2007. Accepted for publication October 10, 2007. Supported by the Canadian Institutes of Health Research, Ottawa, Ontario, Canada (Drs. Zhang and Slutsky). Dr. Vaschetto was supported by the Regione Piemonte, Turin, Italy. Dr. Kuiper was supported by the Ter Meulen Fund of the Royal Netherlands Academy of Arts and Science, Amsterdam, The Netherlands.

Address correspondence to Dr. Slutsky: Room 4-042 Queen Wing, 30 Bond Street, Toronto, Ontario M5B 1W8, Canada. slutska@smh.toronto.on.ca. This article may be accessed for personal use at no charge through the Journal Web site, www.anesthesiology.org.

ney apoptosis and thus preserved renal function during high- $V_T$  ventilation.

## Materials and Methods

### *Animal Preparation*

The protocol was approved by the institutional animal care committee at St. Michael's Hospital, Toronto, Ontario, Canada. Thirty-six male Sprague-Dawley rats (Charles Rivers, St. Constan, Quebec, Canada) weighing  $290 \pm 10$  g were anesthetized with intraperitoneal injection of 10 mg/kg xylazine (Bayer, Toronto, Ontario, Canada) and 100 mg/kg ketamine (Bimeda-MTC, Cambridge, Ontario, Canada). Anesthesia was maintained with  $1 \text{ mg} \cdot \text{kg}^{-1} \cdot \text{h}^{-1}$  xylazine and  $20 \text{ mg} \cdot \text{kg}^{-1} \cdot \text{h}^{-1}$  ketamine *via* a jugular vein; muscle relaxation was achieved by intravenous administration of  $0.6 \text{ mg} \cdot \text{kg}^{-1} \cdot \text{h}^{-1}$  pancuronium bromide (Sabex Inc., Quebec, Canada). Rats were placed on a heating pad to maintain core temperature at  $37^\circ\text{C}$ . A tracheostomy was performed for intratracheal cannulation (14 gauge). The right carotid artery was catheterized for blood sampling and continuous arterial blood pressure measurements. The bladder was catheterized and sutured using a transabdominal approach for urine sampling.

### *Experimental Protocol*

The rats were initially ventilated at  $V_T$  6 ml/kg and positive end-expiratory pressure (PEEP) of 5 cm  $\text{H}_2\text{O}$  (Servo 300 ventilator; Siemens, Munich, Germany). After a baseline arterial blood gas measurement (Corning 248 blood gas analyzer; Ciba Corning, Medfield, MA) to confirm similar gas exchange conditions in all animals, lipopolysaccharide (055:B5; Sigma-Aldrich, St. Louis, MO) at a dose of 6 mg/kg in 0.5 ml normal saline was administered by using an intratracheal aerosolizer (PennCentury Inc., Philadelphia, PA). Five minutes later, a recruitment maneuver was performed by increasing PEEP level to 25 cm  $\text{H}_2\text{O}$  for five breaths, followed by 15 min of stabilization under the ventilator settings described above. The rats were then randomly allocated into four groups ( $n = 9$  each) and ventilated for 4 h: group 1 (low  $V_T$  + PJ-34):  $V_T$  6 ml/kg, PEEP 5 cm  $\text{H}_2\text{O}$  with infusion of PJ-34 (Alexis Biochemicals, Lausen, Switzerland); group 2 (low  $V_T$  + vehicle):  $V_T$  6 ml/kg, PEEP 5 cm  $\text{H}_2\text{O}$  with the vehicle solution (normal saline); group 3 (high  $V_T$  + PJ-34):  $V_T$  15 ml/kg, no PEEP with infusion of PJ-34; and group 4 (high  $V_T$  + vehicle):  $V_T$  15 ml/kg, no PEEP with vehicle solution. Immediately after the randomization, PJ-34 was administered intravenously as a loading dose of 10 mg/kg over 30 min, followed by continuous infusion at  $2 \text{ mg} \cdot \text{kg}^{-1} \cdot \text{h}^{-1}$  for the remainder of the experiments.<sup>28</sup> Arterial carbon dioxide tension ( $\text{Paco}_2$ ) was maintained at  $40 \pm 5$  mmHg by adjusting respiratory rate. Inspiration-to-expiration ratio was set to 1:2, and the fraction of inspired oxygen ( $\text{Fio}_2$ ) was 0.45.

### *Measurements*

Arterial blood gases were analyzed 30 min after randomization and hourly thereafter. Urine samples were collected during the last hour after emptying the urine tube. Upon completion of the mechanical ventilation, whole blood was collected for measurements of cytokines and creatinine, and the animals were killed with an overdose of anesthesia. Lungs and kidneys were harvested for histologic examination. Plasma and urine were stored at  $-80^\circ\text{C}$  until assayed.

### *PARP Activity Assay*

Poly(adenosine diphosphate-ribose) polymerase activity (PARP Universal Colorimetric Assay Kit; R&D Systems, Inc., Minneapolis, MN) was determined in lung homogenates by following the manufacturer's instruction, and the results were expressed as units of PARP per gram protein.

### *Bronchoalveolar Lavage and Wet-to-Dry Weight Ratio*

The left upper lobe was excised for histologic examination. The right middle lobe was used to estimate wet-to-dry weight ratio, and the right lower lobe was snap frozen for cytokine measurements. The left lower and the right upper lobes were lavaged by intratracheal instillation of 2 ml cold phosphate-buffered saline (Sigma-Aldrich). After 5 s, the bronchoalveolar lavage fluid was obtained. This procedure was repeated twice.

After centrifugation, the bronchoalveolar lavage fluid was frozen at  $-80^\circ\text{C}$  until further analysis. The cell pellet was resuspended in 1 ml phosphate-buffered saline for cell differentiation by using the Hemacolor Stain Set (EM Diagnostic System, Gibbstown, NJ).

### *Measurements of Cytokines, PAI-1 Activity, and Tissue Factor Activity*

Analysis of tumor necrosis factor  $\alpha$  (TNF- $\alpha$ ) and interleukin 6 (IL-6) in plasma, lung, and kidney homogenates was performed in a blinded fashion using rat-specific enzyme-linked immunosorbent assay kits (BioSource International, Camarillo, CA) at 450 nm (Multiskan Asscent microplate photometer; Thermo Lab Systems, Helsinki, Finland). PAI-1 activity (Innovative Research, Inc., Southfield, MI) and tissue factor activity (American Diagnostica Inc., Stamford, CT) were determined in plasma and lung homogenates. The tissue factor activity kit is specific for human but crossly reacts with rat tissue factor.<sup>29</sup> Total protein concentration in lung and kidney homogenates was determined by a Bradford assay (Bio-Rad Laboratories, Inc., Hercules, CA) using bovine serum albumin to construct a standard curve.

### *Lung and Kidney Apoptosis*

Apoptosis was quantified from paraffin sections of lung and kidney by terminal deoxynucleotidyltransferase-me-

**Fig. 1.** Effects of PJ-34 on arterial pressure and respiratory variables during mechanical ventilation. The rats received lipopolysaccharide at time 0, followed by mechanical ventilation. *n* = 9/group. (A) Mean arterial pressure (MAP) over time. (B) Plateau pressure over time. HTV = high tidal volume; LTV = low tidal volume. (C) Arterial oxygen tension (PaO<sub>2</sub>)/fraction of inspired oxygen (FiO<sub>2</sub>) ratio over time. (D) Arterial carbon dioxide tension (PaCO<sub>2</sub>) over time. \**P* < 0.05, LTV + vehicle versus HTV + vehicle and HTV + vehicle versus HTV + PJ-34 at time 240 min.

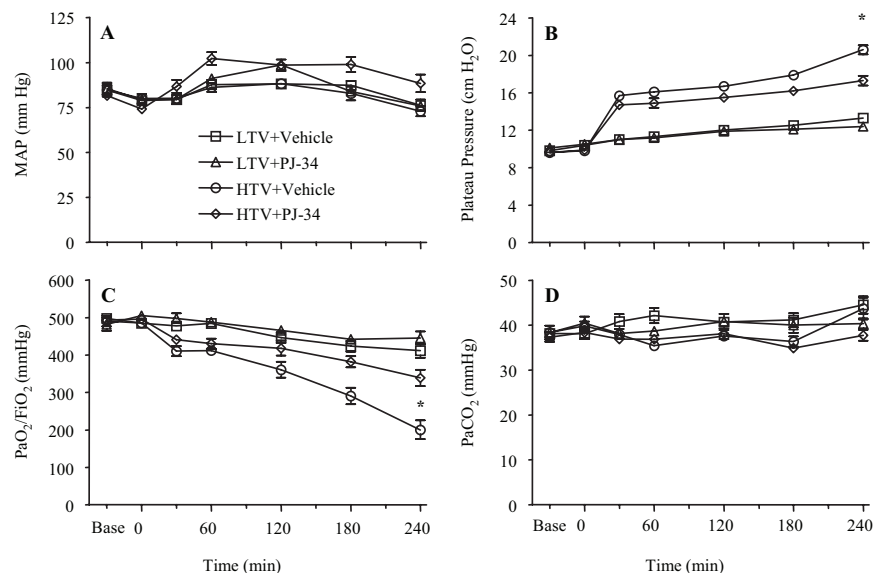

diated dUTP nick end labeling (TUNEL) assay. Hematoxylin staining for nucleus was also performed to identify individual cell. Twelve fields randomly chosen in each section were read in a blinded fashion. An apoptotic index was calculated as  $[100\% \times (\text{TUNEL-positive cells}) / (\text{total cells})]$ .

#### Caspase-3 Enzymatic Activity

Caspase-3 activity was determined in lung and kidney homogenates (Caspase-3 Colorimetric Assay kit; R&D Systems, Inc.). Recombinant human caspase-3 enzyme was used to construct a standard curve (R&D Systems, Inc.). Results were normalized to protein levels.

#### Lactate Dehydrogenase Assay

The lactate dehydrogenase assay (Cytotoxicity Detection Kit; Roche Applied Science, Mannheim, Germany) was performed at 492 nm.

#### Histology

The lung injury scores, including alveolar collapse, perivascular hemorrhage, alveolar hemorrhage, perivascular edema, vascular congestion, alveolar polymorphonuclear leukocytes, membranes, alveolar edema, macrophages, and bronchial epithelial lesions, were performed by a pathologist who was unaware of the experimental groups. Five regions from each specimen were examined, and an injury score of 0–3 (0 = normal; 1 = mild; 2 = moderate; 3 = severe) was assigned and then calculated for a total score of lung injury.

#### Creatinine Clearance

Creatinine clearance was calculated over the last hour of experiments using the formula  $CC = U_{Cr} \times V/P_{Cr}$ , where  $U_{Cr}$  represents the creatinine concentration in urine (mM),  $V$  represents the urine flow (ml/min), and  $P_{Cr}$  represents the creatinine concentration in plasma (mM).

#### Statistics

Results are reported as mean  $\pm$  SEM. Data were analyzed in nonparametric tests by using the Prism Graphpad 4.0 software package (Prism, San Diego, CA). Comparison among groups was performed using the Kruskal-Wallis test. When an overall *P* value was less than 0.05, a Dunn multiple-comparison *post hoc* analysis was conducted. A *P* value less than 0.05 was considered statistically significant.

## Results

#### Effects of PJ-34 on Hemodynamics, Gas Exchange, and Respiratory Mechanics

Mean arterial pressures were similar at baseline and during the experiments among groups (fig. 1A), as was fluid administration (low  $V_T$  + vehicle:  $1.4 \pm 0.1$  ml/h; low  $V_T$  + PJ-34:  $1.5 \pm 0.1$  ml/h; high  $V_T$  + vehicle:  $1.7 \pm 0.1$  ml/h; high  $V_T$  + PJ-34:  $1.4 \pm 0.1$  ml/h; *P* = not significant). Airway plateau pressure was higher in the high- $V_T$  groups, which was attenuated by the treatment with PJ-34 (fig. 1B). Mean values of arterial carbon dioxide tension (PaO<sub>2</sub>)/FiO<sub>2</sub> ratio were similar in all animals until the second hour of mechanical ventilation, when the PaO<sub>2</sub>/FiO<sub>2</sub> ratio decreased in the high- $V_T$  group without PJ-34 treatment compared with the other groups (fig. 1C). There were no differences in the levels of PaCO<sub>2</sub> (fig. 1D), pH, and bicarbonate among groups (data not shown).

#### Effect of PJ-34 on PARP Activity

Poly(adenosine diphosphate-ribose) polymerase activity was increased in the high- $V_T$  group compared with the low- $V_T$  group. The treatment with PJ-34 decreased the PARP activity (fig. 2A).



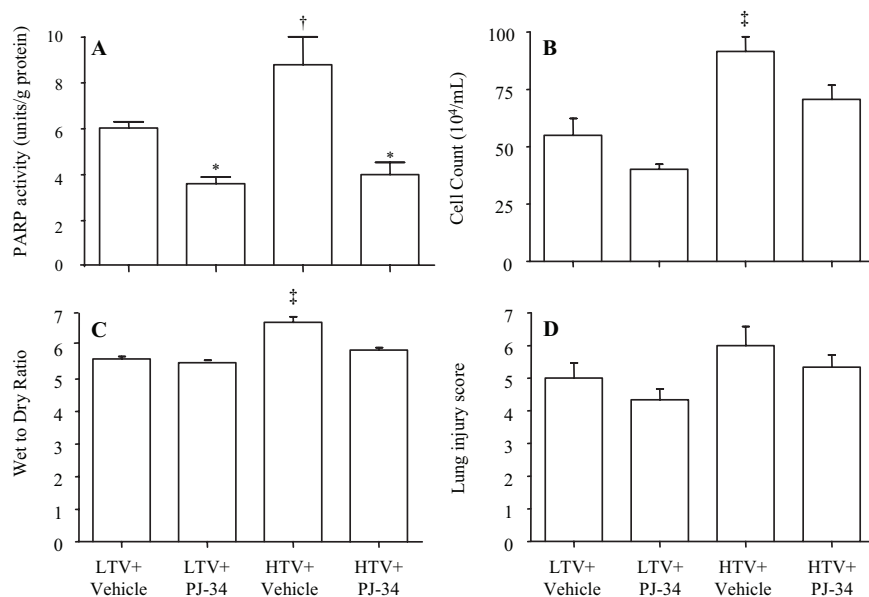

**Fig. 2.** Effects of PJ-34 on poly(adenosine diphosphate-ribose) polymerase (PARP) activity, inflammatory cell counts, and lung injury. (A) PARP activity (U/g protein) in lung homogenate after 4 h of ventilation. HTV = high tidal volume; LTV = low tidal volume. (B) Leukocyte cell counts in lung lavage after 4 h of ventilation. (C) Lung wet-to-dry weight ratio. (D) Lung injury score. \*  $P < 0.05$ , LTV + vehicle versus LTV + PJ-34, and HTV + vehicle versus HTV + PJ-34. †  $P < 0.05$ , LTV + vehicle versus HTV + vehicle. ‡  $P < 0.05$ , HTV + vehicle versus others.

### Effect of PJ-34 on Leukocyte Migration and Lung Injury

The leukocyte count in bronchoalveolar lavage fluid and the mean value of the lung wet-to-dry weight ratio were greater in the high- $V_T$  than in the low- $V_T$  group, and the treatment with PJ-34 attenuated leukocyte migration in the lung and lung edema (figs. 2B and C). Although the lung injury score had a similar pattern as the wet-to-dry weight ratio, the differences did not statistically reach significance (fig. 2D).

### Effect of PJ-34 on Production of Cytokines and Coagulation Variables

**Lung Tissue.** Tumor necrosis factor  $\alpha$  is an early and central cytokine in response to tissue injury.<sup>30,31</sup> IL-6 has been used to guide therapeutic intervention in clinical

trials.<sup>32,33</sup> We found no differences in TNF- $\alpha$  among groups, but IL-6 levels were higher in the high- $V_T$  group than in the other groups, and the treatment with PJ-34 decreased IL-6 level to control levels (figs. 3A and B).

Previous studies demonstrated that ARDS was associated with increased coagulation and decreased fibrinolysis.<sup>34,35</sup> PAI-1 is a main component in the antifibrinolytic system, and tissue factor may initiate the extrinsic coagulation pathway. We observed that the PAI-1 activity of the lung increased in the high- $V_T$  group than in the other groups, and the treatment with PJ-34 normalized PAI-1 levels at a control level (fig. 3C). There was no significant difference in tissue factor activity among the groups (fig. 3D).

**Plasma.** Plasma levels of TNF- $\alpha$  and IL-6 increased in the high- $V_T$  group compared with the low- $V_T$  group,

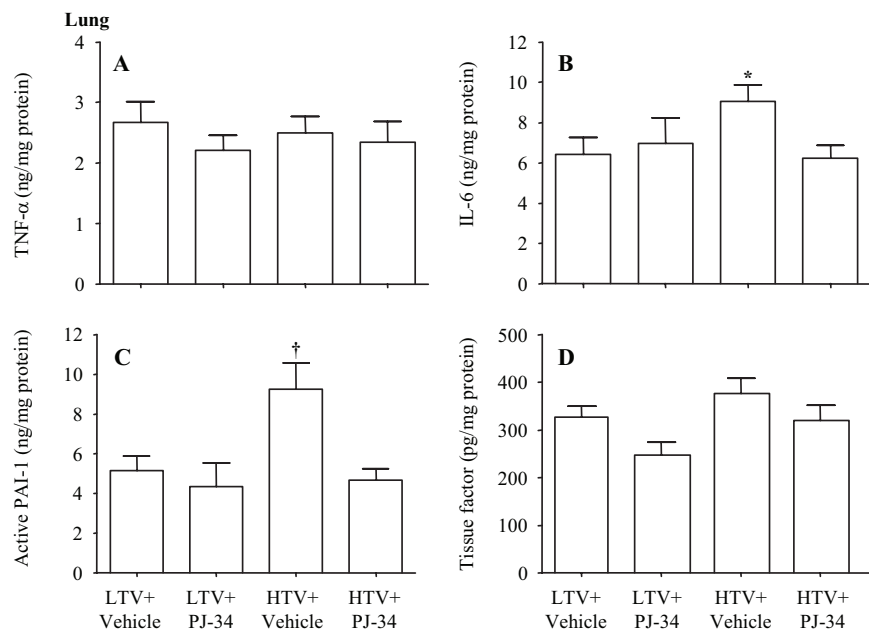

**Fig. 3.** Effects of PJ-34 on the cytokine levels and coagulation variables in lung. The levels of tumor necrosis factor  $\alpha$  (TNF- $\alpha$ ; A), interleukin 6 (IL-6; B), active plasminogen activator inhibitor 1 (PAI-1; C), and tissue factor (D) were measured in lung homogenate after 4 h of ventilation. HTV = high tidal volume; LTV = low tidal volume. \*  $P < 0.05$ , HTV + vehicle versus HTV + PJ-34 or LTV + vehicle. †  $P < 0.05$ , HTV + vehicle versus others.

**Fig. 4.** Effects of PJ-34 on the cytokine levels and coagulation variables in plasma. The levels of tumor necrosis factor  $\alpha$  (TNF- $\alpha$ ; **A**), interleukin 6 (IL-6; **B**), active plasminogen activator inhibitor 1 (PAI-1; **C**), and tissue factor (**D**) were measured in plasma after 4 h of ventilation. HTV = high tidal volume; LTV = low tidal volume. \*  $P < 0.05$ , HTV + vehicle *versus* HTV + PJ-34 or LTV + vehicle. †  $P < 0.05$ , HTV + vehicle *versus* others.

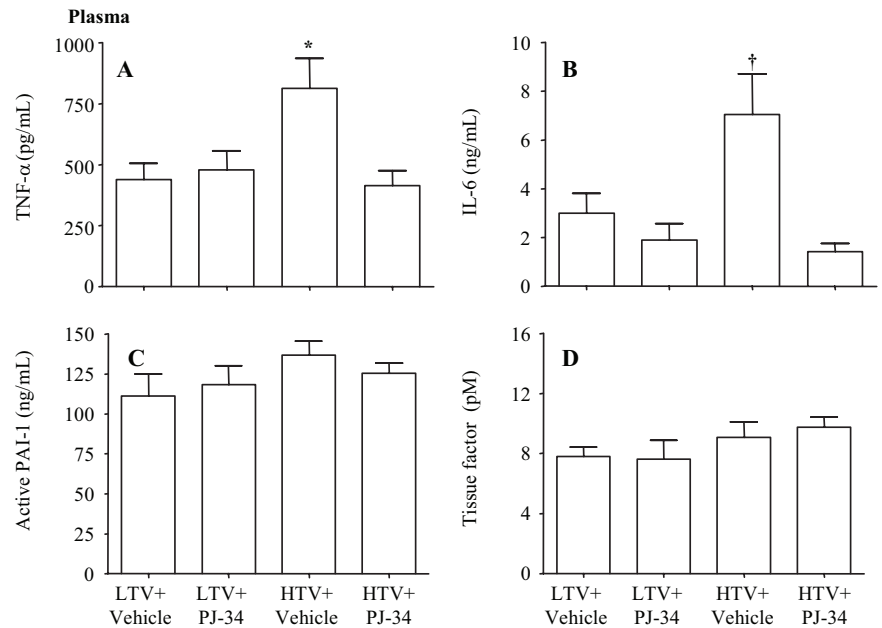

which was blunted by the administration of PJ-34 (figs. 4A and B). The expression of PAI-1 and tissue factor activity was similar in all of the groups (figs. 4C and D).

**Kidney Tissue.** There were no significant differences in the levels of TNF- $\alpha$ , IL-6, PAI-1, and tissue factor activity between the high- $V_T$  and low- $V_T$  groups irrespective of PJ-34 treatment (data not shown).

#### Organ Apoptosis

**Lung Tissue.** Figure 5A shows a representative image of the TUNEL staining to detect apoptosis. The apoptotic index (defined as percentage of TUNEL-positive cells divided by the total cells) was higher in the high- $V_T$

group than in the other groups, and the treatment with PJ-34 reduced the apoptotic index (fig. 5B). This observation was in agreement with a decreased caspase-3 activity in the high- $V_T$  group treated with PJ-34 (fig. 5C). This observation was further confirmed by an increased level of lactate dehydrogenase activity as an index of cell death in the high- $V_T$  group compared with the low- $V_T$  group, and treatment of PJ-34 decreased lactate dehydrogenase activity (fig. 5D).

**Kidney Tissue.** The degree of apoptosis was greater in the high- $V_T$  group than in the other groups, and there seemed to be more apoptotic cells in the medulla compared with the cortex (figs. 6A-C). The greater number

**Fig. 5.** Effects of PJ-34 on lung apoptosis. (A) Representative terminal deoxynucleotidyltransferase-mediated dUTP nick end labeling staining in the lung. Apoptotic cells are identified by the presence of brown staining (dark dots). Hematoxylin staining was also performed to identify individual nuclei. HTV = high tidal volume; LTV = low tidal volume. (B) Apoptotic index. The apoptotic index was expressed as the percentage of positive nuclei. \*  $P < 0.05$ , HTV + vehicle *versus* others. (C) Caspase-3 activity. The lung homogenate was clarified by centrifugation at 5,000g for 5 min, and the supernatant was incubated with caspase-3 colorimetric substrate (DEVD-pNA) at 37°C for 30 min. Concentrations of released chromophore pNA were measured spectrophotometrically at a wavelength of 405 nm. †  $P < 0.05$ , HTV + vehicle *versus* HTV + PJ-34. (D) Lactate dehydrogenase levels were measured in bronchoalveolar lavage fluid after 4 h mechanical ventilation. ‡  $P < 0.05$ , HTV + vehicle *versus* LTV + vehicle.

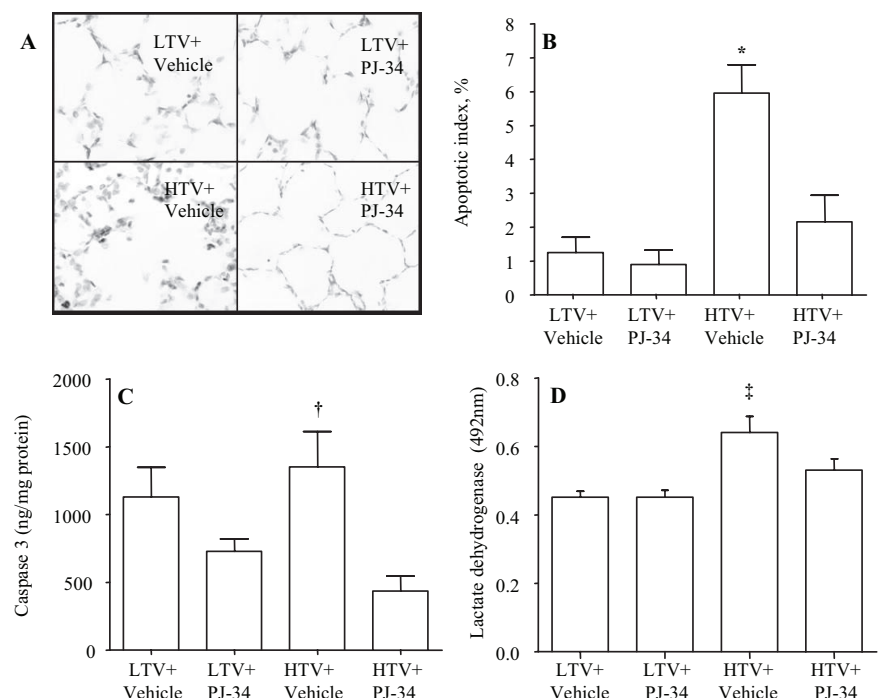

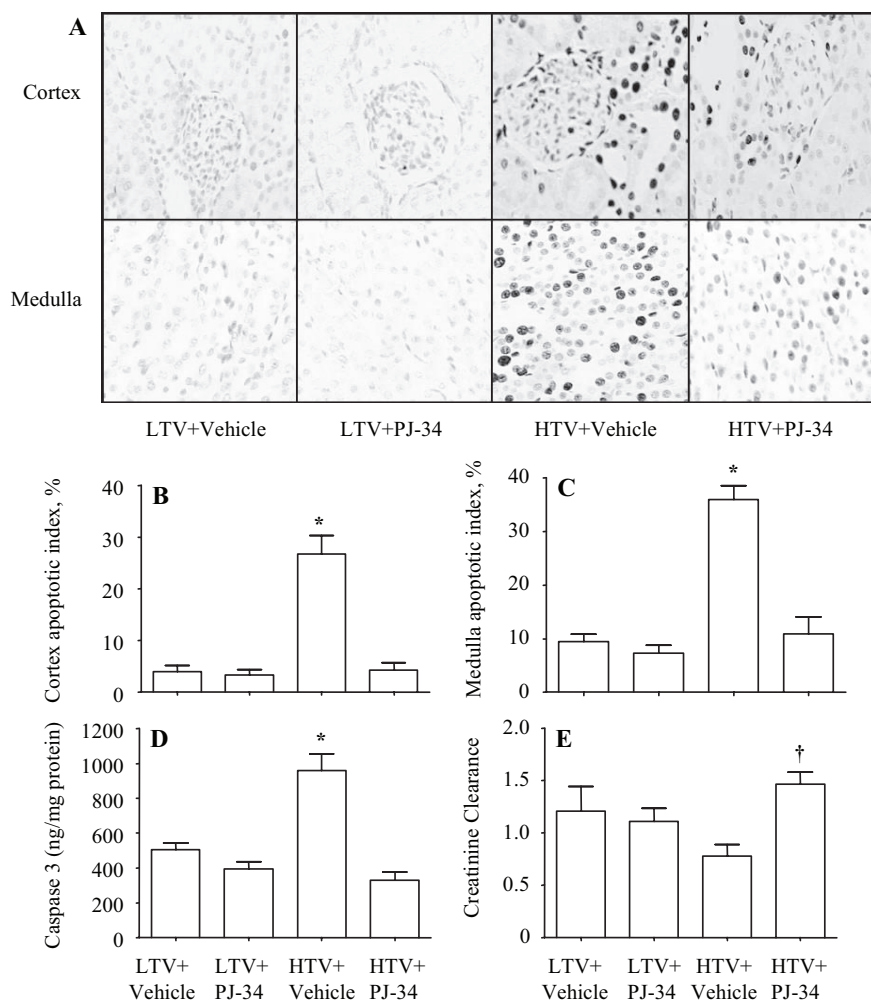

**Fig. 6.** Effects of PJ-34 on kidney apoptosis and function. (A) Representative terminal deoxynucleotidyltransferase-mediated dUTP nick end labeling staining in kidney cortex and medulla. Apoptotic cells are identified by the presence of brown staining (dark dots). Hematoxylin staining was also performed to identify individual nuclei. HTV = high tidal volume; LTV = low tidal volume. (B) Apoptotic index in cortex. The apoptotic index was expressed as the percentage of positive nuclei. (C) Apoptotic index in medulla. (D) Caspase-3 activity in kidney homogenate. (E) Creatinine clearance (CC) was measured over the last hour of mechanical ventilation.  $CC = U_{Cr} \times V/P_{Cr}$ , where  $U_{Cr}$  represents the creatinine concentration in urine (mM),  $V$  represents the urine flow (ml/min), and  $P_{Cr}$  represents the creatinine concentration in plasma (mM). \*  $P < 0.05$ , HTV + vehicle versus others. †  $P < 0.05$ , HTV + vehicle versus HTV + PJ-34.

of apoptotic cells was associated with higher levels of caspase-3 activity (fig. 6D). The administration of PJ-34 reduced the apoptotic index as well as the caspase-3 activity (figs. 6A-D). The decreased apoptotic index was associated with an increased creatinine clearance (fig. 6E).

## Discussion

The current study provides evidence that PARP activation plays an important role in the development of VILI and inflammatory responses during mechanical ventilation after lipopolysaccharide priming. Inhibition of PARP with PJ-34 reduced lung injury and inflammatory responses and preserved kidney function.

Sepsis-associated ARDS shows the highest mortality rate in the ARDS population<sup>36,37</sup>; mortality is lower when ARDS occurs after gastric aspiration, trauma, or fat embolism.<sup>38</sup> A higher incidence of ARDS is present in patients with sepsis where overwhelming inflammatory responses have taken place.<sup>36,37</sup> To portray this clinical situation, we used a two-hit model combining an initial lipopolysaccharide instillation to induce pulmonary inflammation, followed by mechanical ventilation. The

choice of  $V_T$  was based on certain clinical applications, *i.e.*, a  $V_T$  of 6 ml/kg has been suggested to ventilate patients with ARDS,<sup>9</sup> and a  $V_T$  of 15 ml/kg is reportedly used in patients without previous lung injury subjected to a short-term mechanical ventilation.<sup>39</sup> Similar to other two-hit models such as acid aspiration and ischemia-reperfusion followed by high- $V_T$  ventilation,<sup>2,6</sup> we observed an increased plateau pressure, a lower  $PaO_2/FiO_2$  ratio and an enhanced pulmonary and systemic inflammatory response, and distal organ dysfunction. Because ARDS is implicated with inflammatory responses, we believe that the results observed in the current two-hit model may also apply to a single-hit of ARDS resulting from pulmonary source.

We demonstrated in the current model an increased PARP activity in the lung of the animals ventilated with high  $V_T$  compared with the low- $V_T$  group. PARP inhibition by PJ-34 attenuated inflammatory responses and protected lung and kidney function. We believe that the mechanisms by which PJ-34 exerted beneficial effects in our model are through inhibition of both PARP and NF- $\kappa$ B activity. It has been shown that pharmacologic inhibition of PARP attenuated the DNA-binding capacity and subsequent reduction of NF- $\kappa$ B transcriptional activ-

ity.<sup>40-43</sup> The expression of NF- $\kappa$ B-dependent proinflammatory mediators was decreased in PARP-1-deficient mice.<sup>20,23</sup> It has been suggested that PARP binds NF- $\kappa$ B after the translocation of the  $\kappa$ B heterodimer in the nucleus at the stage of the formation of the transcription complex, altering DNA binding affinity to NF- $\kappa$ B.<sup>23,44</sup> These studies suggest that NF- $\kappa$ B could be a downstream pathway of PARP-1. Interestingly, other studies reported that neither enzymatic activity nor the DNA-binding activity of PARP-1 was required for NF- $\kappa$ B-dependent transcriptional activation.<sup>21</sup> We did not measure NF- $\kappa$ B activation in the current study, but we and others have previously shown that mechanical ventilation resulted in NF- $\kappa$ B translocation in the lung of animal models of acute lung injury and ARDS.<sup>45,46</sup> It has been demonstrated that inhibition of NF- $\kappa$ B translocation resulted in a reduction in VILI by using other pharmacologic interventions, such as phosphoinositide 3-OH kinase inhibitor and genistein.<sup>46-49</sup>

Pharmacologic inhibition of PARP has been investigated in a variety of experimental conditions of acute lung injury and lipopolysaccharide-induced organ injury.<sup>17,28,50-52</sup> When mice were subjected to intratracheal injection of lipopolysaccharide for 24 h, the treatment with PJ-34 attenuated lung injury by reducing leukocyte extravasation and pulmonary inflammation.<sup>50</sup> In an ovine pneumonia model, treatment with PARP inhibitor INO-1001 preserved lung histology after intrabronchial injection of *Pseudomonas aeruginosa* bacteria associated with an increased oxygenation and a better respiratory mechanic.<sup>51</sup> The administration of the PARP inhibitor 3-aminobenzamide protected against endothelial dysfunction in a rat model of endotoxic shock.<sup>52</sup> Moreover, it has been reported that PJ-34 improved survival rate and cardiovascular function in a pig model of sepsis induced by *Escherichia coli*.<sup>28</sup> Our results are in accord with the previous studies to support the concept that PARP plays an important role in the development of inflammation. We further expand the previous studies by demonstrating that inhibition of PARP can attenuate mechanical ventilation-associated biotrauma in the context of VILI.

It has been shown that lung parenchymal cells produce proinflammatory cytokines in response to tissue stretch contributing to VILI.<sup>53</sup> Damage to the alveolar-capillary barrier in combination with release of inflammatory cytokines is thought to be a major contributor to the development of multiple organ dysfunction syndrome and death.<sup>54</sup> Our data demonstrate that PARP inhibition can attenuate IL-6 release in the lung, and attenuate concentrations of both TNF- $\alpha$  and IL-6 in the circulation. These results are consistent with previous reports demonstrating that inhibition of PARP resulted in a down-regulation of chemokines and cytokines in several animal models of lung injury.<sup>50,55,56</sup> A decreased level of IL-6 might have led to an attenuated expression of PAI-1 in the lungs after PJ-34 treatment.<sup>57</sup>

Leukocyte transmigration is an important feature of diffused alveolar damage characterizing VILI.<sup>58</sup> We find that PARP inhibition reduced leukocyte infiltration in the lung, decreased permeability, and improved oxygenation and respiratory mechanics. Other studies have reported a role of PARP in the inhibition of leukocyte trafficking in conditions such as inflammation, shock, and ischemia-reperfusion injury.<sup>50,59,60</sup>

We have previously observed some degree of lung epithelial apoptosis with dominant expression of necrosis in an acid-induced acute lung injury model in rabbits undergoing ventilation with a high  $V_T$ .<sup>2</sup> In the current study, our results show higher levels of apoptosis than of necrosis in the lungs. We also noted that in the kidneys, the baseline apoptosis rate was approximately 10%, and increased to 30-40% with high  $V_T$ , which is higher than that observed in the acid aspiration model in rabbits.<sup>7</sup> The differences are likely due to the different priming stimuli, because acid aspiration resulted in a more severe and direct lung injury, whereas lipopolysaccharide induced more systemic effects. Also, the ventilatory strategies were somewhat different where higher PEEP levels were used in the low- $V_T$  group and some PEEP level was applied in the high- $V_T$  group in the previous study,<sup>7</sup> compared with the current study. Finally, the species difference might have a role with respect to organ sensitivity in response to mechanical ventilation. Of interest, we observed that the administration of PJ-34 reduced apoptosis in the kidney. The exact mechanisms remain to be elucidated, but PARP-deficient mice are protected against ischemic renal injury.<sup>18,61</sup>

In conclusion, we demonstrated that mechanical ventilation can induce PARP activation, and the pharmacologic inhibition of PARP reduced inflammatory responses and VILI and preserved kidney function in the rat model of lipopolysaccharide priming followed by mechanical ventilation.

## References

1. Chiumello D, Pristine G, Slutsky AS: Mechanical ventilation affects local and systemic cytokines in an animal model of acute respiratory distress syndrome. *Am J Respir Crit Care Med* 1999; 160:109-16
2. Imai Y, Parodo J, Kajikawa O, de Perrot M, Fischer S, Edwards V, Cutz E, Liu M, Keshavjee S, Martin TR, Marshall JC, Ranieri VM, Slutsky AS: Injurious mechanical ventilation and end-organ epithelial cell apoptosis and organ dysfunction in an experimental model of acute respiratory distress syndrome. *JAMA* 2003; 289:2104-12
3. Slutsky AS: Ventilator-induced lung injury: From barotrauma to biotrauma. *Respir Care* 2005; 50:646-59
4. Tremblay L, Valenza F, Ribeiro SP, Li J, Slutsky AS: Injurious ventilatory strategies increase cytokines and c-fos mRNA expression in an isolated rat lung model. *J Clin Invest* 1997; 99:944-52
5. Tremblay LN, Slutsky AS: Ventilator-induced lung injury: From the bench to the bedside. *Intensive Care Med* 2006; 32:24-33
6. Crimi E, Zhang H, Han RN, Sorbo LD, Ranieri VM, Slutsky AS: Ischemia and reperfusion increases susceptibility to ventilator-induced lung injury in rats. *Am J Respir Crit Care Med* 2006; 174:178-86
7. Kuiper JW, Groeneveld AB, Slutsky AS, Plotz FB: Mechanical ventilation and acute renal failure. *Crit Care Med* 2005; 33:1408-15
8. Ranieri VM, Giunta F, Suter PM, Slutsky AS: Mechanical ventilation as a mediator of multisystem organ failure in acute respiratory distress syndrome. *JAMA* 2000; 284:43-4
9. Ventilation with lower tidal volumes as compared with traditional tidal



volumes for acute lung injury and the acute respiratory distress syndrome. The Acute Respiratory Distress Syndrome Network. *N Engl J Med* 2000; 342:1301-8

10. Parsons PE, Eisner MD, Thompson BT, Matthay MA, Ancukiewicz M, Bernard GR, Wheeler AP: Lower tidal volume ventilation and plasma cytokine markers of inflammation in patients with acute lung injury. *Crit Care Med* 2005; 33:1-6

11. Kraus WL, Lis JT: PARP goes transcription. *Cell* 2003; 113:677-83

12. Hecceg Z, Wang ZQ: Functions of poly(ADP-ribose) polymerase (PARP) in DNA repair, genomic integrity and cell death. *Mutat Res* 2001; 477:97-110

13. Berger NA: Poly(ADP-ribose) in the cellular response to DNA damage. *Radiat Res* 1985; 101:4-15

14. D'Amours D, Sallmann FR, Dixit VM, Poirier GG: Gain-of-function of poly(ADP-ribose) polymerase-1 upon cleavage by apoptotic proteases: implications for apoptosis. *J Cell Sci* 2001; 114:3771-8

15. Ha HC, Snyder SH: Poly(ADP-ribose) polymerase is a mediator of necrotic cell death by ATP depletion. *Proc Natl Acad Sci U S A* 1999; 96:13978-82

16. Virag L, Szabo C: The therapeutic potential of poly(ADP-ribose) polymerase inhibitors. *Pharmacol Rev* 2002; 54:375-429

17. Kieffmann R, Heckel K, Doerger M, Schenkat S, Kupatt C, Stoekelhuber M, Wesierska-Gadek J, Goetz AE: Role of PARP on iNOS pathway during endotoxin-induced acute lung injury. *Intensive Care Med* 2004; 30:1421-31

18. Zheng J, valaraja-Narashimha K, Singaravelu K, Padanilam BJ: Poly(ADP-ribose) polymerase-1 gene ablation protects mice from ischemic renal injury. *Am J Physiol Renal Physiol* 2005; 288:F387-98

19. Jagtap P, Soriano FG, Virag L, Liaudet L, Mabley J, Szabo E, Hasko G, Marton A, Lorigados CB, Gallyas F Jr, Sumegi B, Hoyt DG, Baloglu E, VanDuzer J, Salzman AL, Southan GJ, Szabo C: Novel phenanthridinone inhibitors of poly(adenosine 5'-diphosphate-ribose) synthetase: Potent cytoprotective and anti-shock agents. *Crit Care Med* 2002; 30:1071-82

20. Hassa PO, Hottiger MO: A role of poly(ADP-ribose) polymerase in NF- $\kappa$ B transcriptional activation. *Biol Chem* 1999; 380:953-9

21. Hassa PO, Covic M, Hasan S, Imhof R, Hottiger MO: The enzymatic and DNA binding activity of PARP-1 are not required for NF- $\kappa$ B coactivator function. *J Biol Chem* 2001; 276:45588-97

22. Hassa PO, Haenni SS, Buerki C, Meier NI, Lane WS, Owen H, Gersbach M, Imhof R, Hottiger MO: Acetylation of poly(ADP-ribose) polymerase-1 by p300/CREB-binding protein regulates coactivation of NF- $\kappa$ B-dependent transcription. *J Biol Chem* 2005; 280:40450-64

23. Oliver FJ, Menissier-de Murcia J, Nacci C, Decker P, Andriantsitohaina R, Muller S, de la Rubia G, Stoclet JC, de Murcia G: Resistance to endotoxic shock as a consequence of defective NF- $\kappa$ B activation in poly(ADP-ribose) polymerase-1 deficient mice. *EMBO J* 1999; 18:4446-54

24. Goebel DJ, Winkler BS: Blockade of PARP activity attenuates poly(ADP-ribose)ylation but offers only partial neuroprotection against NMDA-induced cell death in the rat retina. *J Neurochem* 2006; 98:1732-45

25. Roessner JP, Vagts DA, Iber T, Eipel C, Vollmar B, Noldge-Schomburg GF: Protective effects of PARP inhibition on liver microcirculation and function after haemorrhagic shock and resuscitation in male rats. *Intensive Care Med* 2006; 32:1649-57

26. Szabo G, Bahrle S, Stumpf N, Sonnenberg K, Szabo EE, Pacher P, Csont T, Schulz R, Dengler TJ, Liaudet L, Jagtap PG, Southan GJ, Vahl CF, Hagl S, Szabo C: Poly(ADP-ribose) polymerase inhibition reduces reperfusion injury after heart transplantation. *Circ Res* 2002; 90:100-6

27. Veres B, Gallyas F Jr, Varbiro G, Berente Z, Osz E, Szekeres G, Szabo C, Sumegi B: Decrease of the inflammatory response and induction of the Akt/protein kinase B pathway by poly(ADP-ribose) polymerase 1 inhibitor in endotoxin-induced septic shock. *Biochem Pharmacol* 2003; 65:1373-82

28. Goldfarb RD, Marton A, Szabo E, Virag L, Salzman AL, Glock D, Akhter I, McCarthy R, Parrillo JE, Szabo C: Protective effect of a novel, potent inhibitor of poly(adenosine 5'-diphosphate-ribose) synthetase in a porcine model of severe bacterial sepsis. *Crit Care Med* 2002; 30:974-80

29. Kubo-Inoue M, Egashira K, Usui M, Takemoto M, Ohtani K, Katoh M, Shimokawa H, Takeshita A: Long-term inhibition of nitric oxide synthesis increases arterial thrombogenicity in rat carotid artery. *Am J Physiol Heart Circ Physiol* 2002; 282:H1478-84

30. Waage A: Production and clearance of tumor necrosis factor in rats exposed to endotoxin and dexamethasone. *Clin Immunol Immunopathol* 1987; 45:348-55

31. Waage A, Halstensen A, Espevik T: Association between tumour necrosis factor in serum and fatal outcome in patients with meningococcal disease. *Lancet* 1987; 1:355-7

32. Miura E, Prociandy RS, Bittar C, Miura CS, Miura MS, Mello C, Christensen RD: A randomized, double-masked, placebo-controlled trial of recombinant granulocyte colony-stimulating factor administration to preterm infants with the clinical diagnosis of early-onset sepsis. *Pediatrics* 2001; 107:30-5

33. Sack U, Biereder B, Elouahidi T, Bauer K, Keller T, Trobs RB: Diagnostic value of blood inflammatory markers for detection of acute appendicitis in children. *BMC Surg* 2006; 6:15-22

34. Idell S, James KK, Levin EG, Schwartz BS, Manchanda N, Maunder RJ, Martin TR, McLarty J, Fair DS: Local abnormalities in coagulation and fibrinolytic pathways predispose to alveolar fibrin deposition in the adult respiratory distress syndrome. *J Clin Invest* 1989; 84:695-705

35. Welty-Wolf KE, Carraway MS, Miller DL, Ortel TL, Ezban M, Ghio AJ, Idell

S, Piantadosi CA: Coagulation blockade prevents sepsis-induced respiratory and renal failure in baboons. *Am J Respir Crit Care Med* 2001; 164:1988-96

36. Hudson LD, Milberg JA, Anardi D, Maunder RJ: Clinical risks for development of the acute respiratory distress syndrome. *Am J Respir Crit Care Med* 1995; 151:293-301

37. Hudson LD, Steinberg KP: Epidemiology of acute lung injury and ARDS. *Chest* 1999; 116:74S-82S

38. Estenssoro E, Dubin A, Laffaire E, Canales H, Saenz G, Moseinco M, Pozo M, Gomez A, Baredes N, Jannello G, Osatnik J: Incidence, clinical course, and outcome in 217 patients with acute respiratory distress syndrome. *Crit Care Med* 2002; 30:2450-6

39. Wrigge H, Zinserling J, Stuber F, von Spiegel T, Hering R, Wetegrove S, Hoeffl A, Putensen C: Effects of mechanical ventilation on release of cytokines into systemic circulation in patients with normal pulmonary function. *ANESTHESIOLOGY* 2000; 93:1413-7

40. Chang WJ, Alvarez-Gonzalez R: The sequence-specific DNA binding of NF- $\kappa$ B is reversibly regulated by the automodification reaction of poly(ADP-ribose) polymerase 1. *J Biol Chem* 2001; 276:47664-70

41. Chiarugi A, Moskowitz MA: Poly(ADP-ribose) polymerase-1 activity promotes NF- $\kappa$ B-driven transcription and microglial activation: Implication for neurodegenerative disorders. *J Neurochem* 2003; 85:306-17

42. Genovesi T, Mazzon E, Muia C, Patel NS, Threadgill MD, Bramanti P, De Sarro A, Thiemermann C, Cuzzocrea S: Inhibitors of poly(ADP-ribose) polymerase modulate signal transduction pathways and secondary damage in experimental spinal cord trauma. *J Pharmacol Exp Ther* 2005; 312:449-57

43. Oumouna-Benachour K, Hans CP, Suzuki Y, Naura A, Datta R, Belmadani S, Fallon K, Woods C, Boulares AH: Poly(ADP-ribose) polymerase inhibition reduces atherosclerotic plaque size and promotes factors of plaque stability in apolipoprotein E-deficient mice: Effects on macrophage recruitment, nuclear factor- $\kappa$ B nuclear translocation, and foam cell death. *Circulation* 2007; 115:2442-50

44. Hassa PO, Hottiger MO: The functional role of poly(ADP-ribose)polymerase 1 as novel coactivator of NF- $\kappa$ B in inflammatory disorders. *Cell Mol Life Sci* 2002; 59:1534-53

45. Held HD, Boettcher S, Hamann L, Uhlig S: Ventilation-induced chemokine and cytokine release is associated with activation of nuclear factor- $\kappa$ B and is blocked by steroids. *Am J Respir Crit Care Med* 2001; 163:711-6

46. Uhlig U, Fehrenbach H, Lachmann RA, Goldmann T, Lachmann B, Vollmer E, Uhlig S: Phosphoinositide 3-OH kinase inhibition prevents ventilation-induced lung cell activation. *Am J Respir Crit Care Med* 2004; 169:201-8

47. Jafari B, Ouyang B, Li LF, Hales CA, Quinn DA: Intracellular glutathione in stretch-induced cytokine release from alveolar type-2 like cells. *Respirology* 2004; 9:43-53

48. Jerng JS, Hsu YC, Wu HD, Pan HZ, Wang HC, Shun CT, Yu CJ, Yang PC: Role of the renin-angiotensin system in ventilator-induced lung injury: An *in vivo* study in a rat model. *Thorax* 2007; 62:527-35

49. Parker JC, Ivey CL, Tucker A: Phosphotyrosine phosphatase and tyrosine kinase inhibition modulate airway pressure-induced lung injury. *J Appl Physiol* 1998; 85:1753-61

50. Liaudet L, Pacher P, Mabley JG, Virag L, Soriano FG, Hasko G, Szabo C: Activation of poly(ADP-ribose) polymerase-1 is a central mechanism of lipopolysaccharide-induced acute lung inflammation. *Am J Respir Crit Care Med* 2002; 165:372-7

51. Murakami K, Enkhbaatar P, Shimoda K, Cox RA, Burke AS, Hawkins HK, Traber LD, Schmalstieg FC, Salzman AL, Mabley JG, Komjati K, Pacher P, Zsengeller Z, Szabo C, Traber DL: Inhibition of poly(ADP-ribose) polymerase attenuates acute lung injury in an ovine model of sepsis. *Shock* 2004; 21:126-33

52. Szabo C, Cuzzocrea S, Zingarelli B, O'Connor M, Salzman AL: Endothelial dysfunction in a rat model of endotoxic shock: Importance of the activation of poly(ADP-ribose) synthetase by peroxynitrite. *J Clin Invest* 1997; 100:723-35

53. Tremblay LN, Miatto D, Hamid Q, Govindarajan A, Slutsky AS: Injurious ventilation induces widespread pulmonary epithelial expression of tumor necrosis factor- $\alpha$  and interleukin-6 messenger RNA. *Crit Care Med* 2002; 30:1693-700

54. Slutsky AS, Tremblay LN: Multiple system organ failure: Is mechanical ventilation a contributing factor? *Am J Respir Crit Care Med* 1998; 157:1721-5

55. Farivar AS, Woolley SM, Fraga CH, Thomas R, Salzman AL, Szabo C, Mulligan MS: Intratracheal poly(ADP) ribose synthetase inhibition ameliorates lung ischemia reperfusion injury. *Ann Thorac Surg* 2004; 77:1938-43

56. Woolley SM, Farivar AS, Naidu BV, Salzman A, Szabo C, Thomas R, Fraga C, Mulligan MS: Role of poly(ADP) ribose synthetase in lung ischemia-reperfusion injury. *J Heart Lung Transplant* 2004; 23:1290-6

57. Samad F, Bergtrom G, Amrani DL: Regulation of plasminogen activation by interleukin-6 in human lung fibroblasts. *Biochim Biophys Acta* 1994; 1221:307-14

58. Choudhury S, Wilson MR, Goddard ME, O'Dea KP, Takata M: Mechanisms of early pulmonary neutrophil sequestration in ventilator-induced lung injury in mice. *Am J Physiol Lung Cell Mol Physiol* 2004; 287:L902-10

59. Liaudet L, Soriano FG, Szabo E, Virag L, Mabley JG, Salzman AL, Szabo C: Protection against hemorrhagic shock in mice genetically deficient in poly(ADP-ribose)polymerase. *Proc Natl Acad Sci U S A* 2000; 97:10203-8

60. Zingarelli B, Szabo C, Salzman AL: Blockade of poly(ADP-ribose) synthetase inhibits neutrophil recruitment, oxidant generation, and mucosal injury in murine colitis. *Gastroenterology* 1999; 116:335-45

61. Nath KA, Norby SM: Reactive oxygen species and acute renal failure. *Am J Med* 2000; 109:665-78
